# Supplementary material
Source: Frontiers journal article supplement (https://www.frontiersin.org/articles/120331)
Supplement: Data_Sheet_1.PDF [file Data_Sheet_1.PDF]

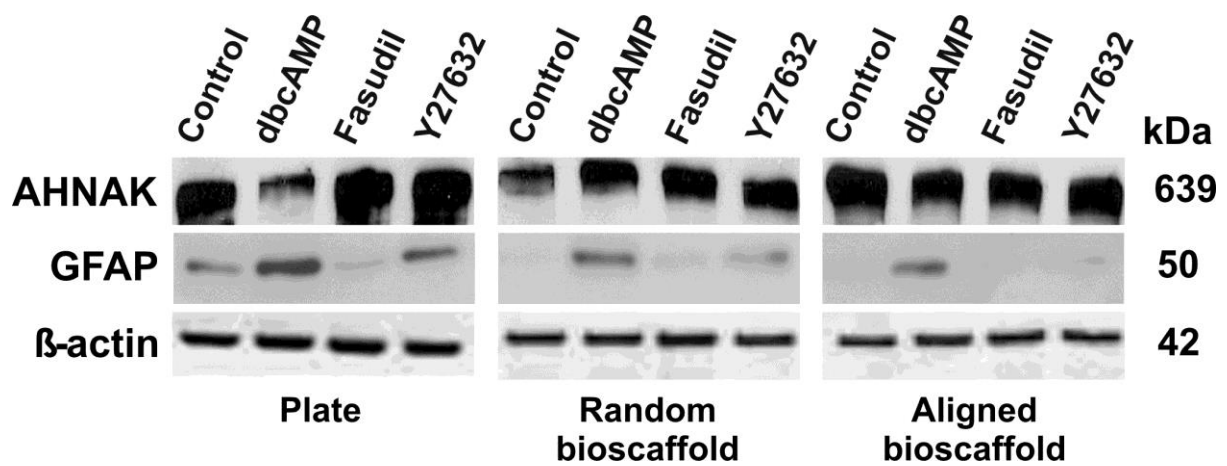

**Supplementary Figure 1. Western blots of GFAP and AHNAK expression from astrocytes on culture plates (2D), random and aligned bioscaffolds.** Astrocytes were treated with dbcAMP (1 mM), Fasudil (100  $\mu$ M) or Y27632 (30  $\mu$ M) for 72 h. Procedures have been described previously (Lau et al. Br J Pharmacol 163: 533-545 (2011) and employed ~10  $\mu$ g protein with MW markers and  $\beta$ -actin (MW 42 kDa) was used as a loading control.
